# Supplementary material
Source: PubMed Central journal article supplement (PMC8565655)
Supplement: NIHMS1714015-supplement-2.pdf [file NIHMS1714015-supplement-2.pdf]

## Supplementary Table S1

| <b>Beam layout by region</b> |                    |                                                                          |                               |
|------------------------------|--------------------|--------------------------------------------------------------------------|-------------------------------|
| <b>Region</b>                | <b>Beam Size</b>   | <b>Isocenter location</b>                                                | <b>Normalization point</b>    |
| <b>Skull &amp; Cspine</b>    | <b>40mm square</b> | <b>center of brain</b>                                                   | <b>Center of brain</b>        |
| <b>C to T spine junction</b> | <b>10mm square</b> | <b>above scapula</b>                                                     | <b>Above the spine body</b>   |
| <b>Sternum</b>               | <b>20mm square</b> | <b>below the sternum enough so edge of beam covers sternum</b>           | <b>skin of the sternum</b>    |
| <b>Tpsine &amp; Lspine</b>   | <b>20mm square</b> | <b>above the spine so the edge of the beam covers the spine</b>          | <b>Above the spine body</b>   |
| <b>Pelvis</b>                | <b>20mm square</b> | <b>above the pelvis so the edge of the beam covers the pelvic girdle</b> | <b>above the pelvic crest</b> |
| <b>Femurs</b>                | <b>20mm square</b> | <b>below the femur</b>                                                   | <b>BM of femur</b>            |
| <b>Spleen</b>                | <b>10mm square</b> | <b>within the spleen</b>                                                 | <b>spleen tissue</b>          |

**Supplementary Table S1:** Radiation beam layout by regions (beam size, isocenter location, normalization point).

## Supplementary Table S2

| Monte Carlo Parameters         |                       |
|--------------------------------|-----------------------|
| Isotropic voxel spacing (mm)   | 0.4                   |
| Variance reduction settings    |                       |
| N split                        | 200                   |
| NRCYCL                         | 0                     |
| ihowfarless                    | off                   |
| Electron range rejection       | on                    |
| ESAVE_GLOBAL (MeV)             | 1                     |
| DOSXYZnrc settings             |                       |
| Global Ecut (MeV)              | 0.736                 |
| Global Pcut (MeV)              | 0.01                  |
| Zero dose to air               | on                    |
| EGSnrc settings                |                       |
| Boundary crossing algorithm    | PRESTA-I              |
| Spin effects                   | off                   |
| Brems angular sampling         | Simple Koch-Motz      |
| Brems cross sections           | NIST                  |
| Bound Compton Scattering       | Impulse approximation |
| Radiative Compton corrections  | off                   |
| Pair angular sampling          | off                   |
| Pair production cross-sections | Bethe-Heitler         |
| Photoelectron angular sampling | off                   |
| Rayleigh scattering            | on                    |
| Atomic relaxations             | off                   |
| Electron impact ionization     | off                   |
| Photon cross sections          | xcom                  |

**Supplemental Table S2: Parameters used for Monte Carlo simulation of TMI treatment plans**

# Supplementary Table S3

**A**

| n=5        | Dmean (Gy) |            |         | D95 (Gy)   |           |         | D5 (Gy)    |            |         |
|------------|------------|------------|---------|------------|-----------|---------|------------|------------|---------|
|            | Prone      | Supine     | Signif? | Prone      | Supine    | Signif? | Prone      | Supine     | Signif? |
| Bone (PTV) | 26.2 ± 1.5 | 26.2 ± 1.5 | no      | 3.5 ± 4.2  | 3.5 ± 4.2 | no      | 40.7 ± 2.9 | 40.7 ± 2.9 | no      |
| Lungs      | 5.1 ± 0.8  | 5.6 ± 0.2  | no      | 1.0 ± 0.1  | 1.1 ± 0.1 | no      | 11.6 ± 0.4 | 11.2 ± 0.2 | no      |
| Gut        | 3.7 ± 0.7  | 3.3 ± 0.4  | no      | 0.7 ± 0.1  | 0.7 ± 0.1 | no      | 10.1 ± 0.7 | 10.7 ± 1.1 | no      |
| Liver      | 4.4 ± 0.5  | 4.5 ± 1.4  | no      | 11.4 ± 1.3 | 1.0 ± 0.1 | no      | 4.8 ± 3.9  | 12.7 ± 3.2 | no      |

**B**

| n=5        | Dmean (Gy)         |                     |                  | D95 (Gy)           |                     |                  | D5 (Gy)            |                     |                  |
|------------|--------------------|---------------------|------------------|--------------------|---------------------|------------------|--------------------|---------------------|------------------|
|            | 16-18g (4-6 weeks) | 29g-31g (14+ weeks) | 20g (8-10 weeks) | 16-18g (4-6 weeks) | 29g-31g (14+ weeks) | 20g (8-10 weeks) | 16-18g (4-6 weeks) | 29g-31g (14+ weeks) | 20g (8-10 weeks) |
| Bone (PTV) | 28.5 ± 0.3         | 27.4 ± 0.6          | 26.2 ± 1.5       | 3.8 ± 3.2          | 1.3 ± 0.1           | 3.6 ± 4.2        | 42.2 ± 1.3         | 51.3 ± 4.6          | 40.7 ± 2.9       |
| Lungs      | 5.2 ± 1.0          | 3.9 ± 1.0           | 5.1 ± 0.8        | 1.1 ± 0.2          | 1.1 ± 0.1           | 5.1 ± 0.8        | 12.0 ± 1.4         | 10.6 ± 1.5          | 11.6 ± 0.5       |
| Gut        | 3.4 ± 0.6          | 2.7 ± 0.4           | 3.7 ± 0.7        | 0.6 ± 0.1          | 0.2 ± 0.4           | 0.7 ± 0.1        | 10.4 ± 0.3         | 10.4 ± 1.4          | 10.2 ± 0.7       |
| Liver      | 5.1 ± 0.1          | 3.8 ± 0.5           | 4.4 ± 0.5        | 0.9 ± 0.1          | 0.8 ± 0.1           | 0.8 ± 0.1        | 12.1 ± 1.4         | 12.7 ± 0.8          | 11.4 ± 1.3       |

**Supplement Table S3. Effect of position and weight on TMI planning. 11Gy reference plan**

# Supplement Figure S1

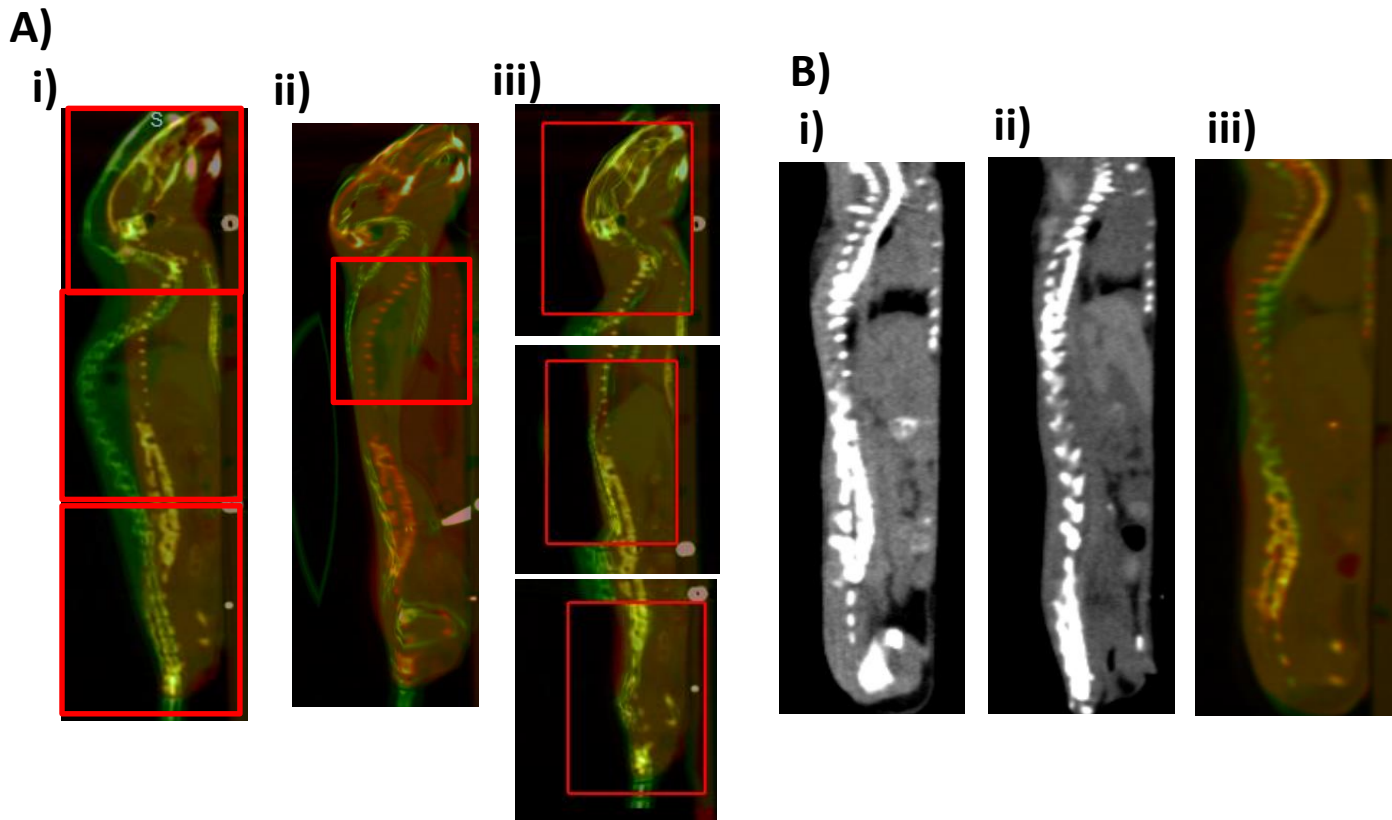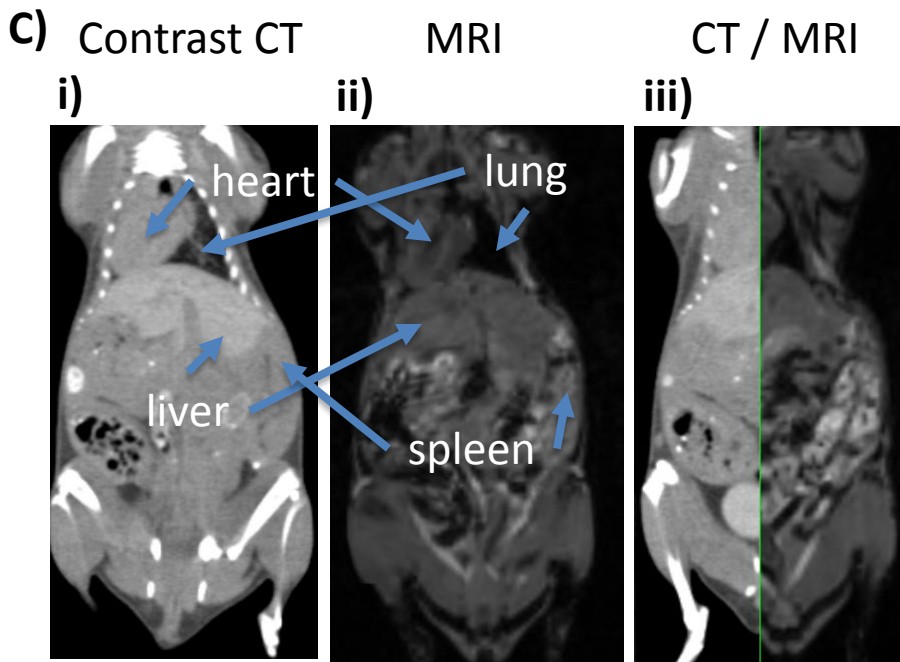

**Supplementary Figure S1: Identification of soft tissue structures using imaging techniques.**

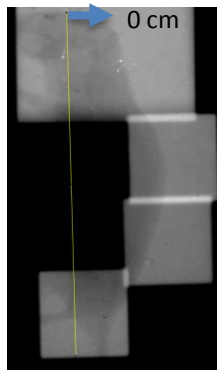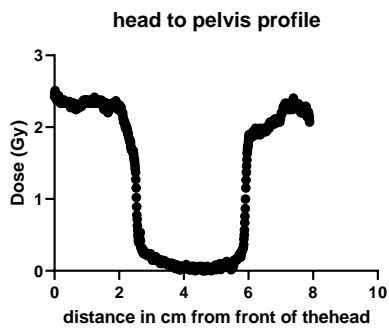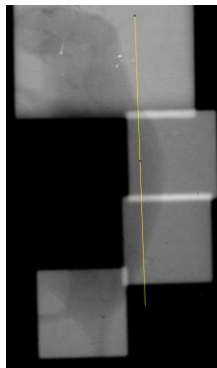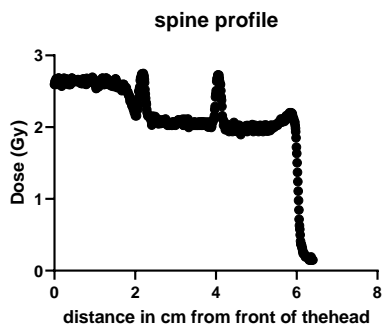

**Supplementary Figure S2: Film profiles of TMI QA treatment plan.**

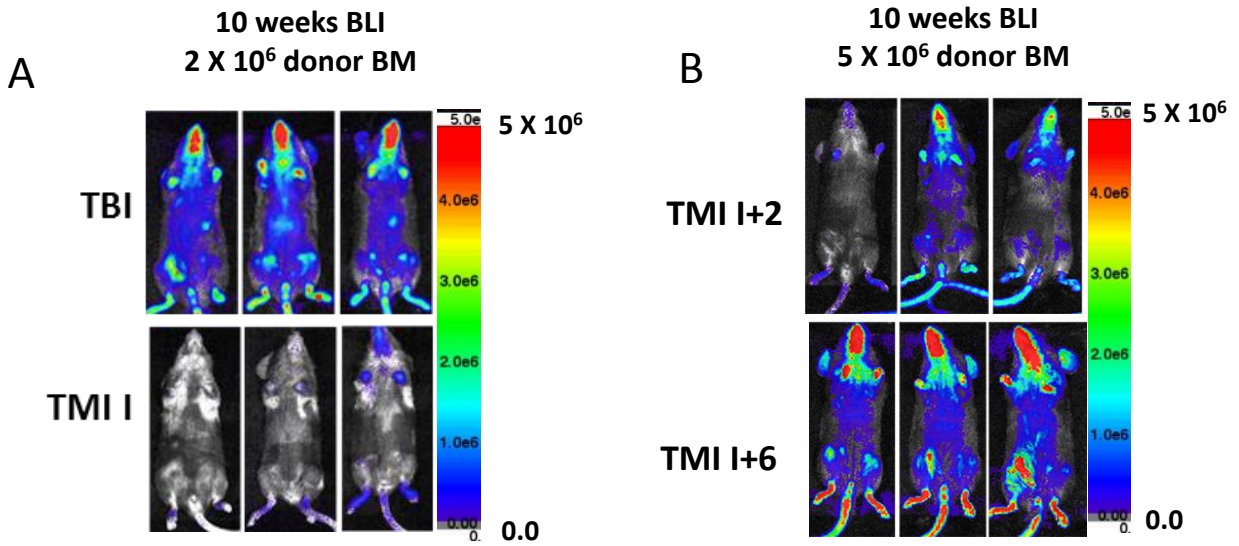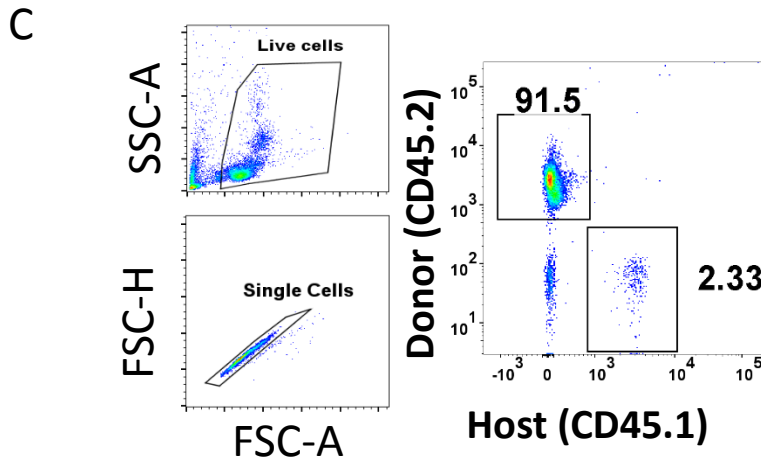

Supplementary Figure S3: TBI and TMI donor cell engraftment

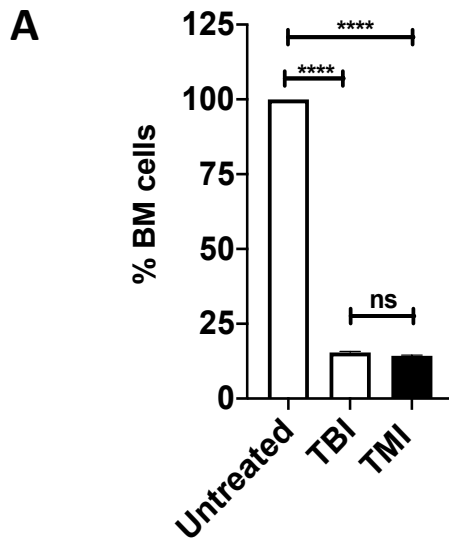

**Supplementary Figure S4: Effect of TBI/TMI on bone marrow cellularity.**
